# Supplementary material for: Insight into the chemical adsorption properties of CO molecules supported on Au or Cu and hybridized Au–CuO nanoparticles
Source: Royal Society of Chemistry journal article supplement (doi:10.1039/c7nr06018a), 2017-01-01
Supplement: c7nr06018a1.pdf [file c7nr06018a1.pdf]

Supplementary information

**Insight into the chemical adsorption properties of CO molecules  
on supported Au or Cu and hybridized Au-CuO nanoparticles**

Jingjie Luo,<sup>1</sup> Yuefeng Liu,<sup>2\*</sup> Yiming Niu,<sup>1</sup> Qian Jiang,<sup>2</sup> Rui Huang,<sup>1</sup>

Bingsen Zhang,<sup>1\*</sup> Dangsheng Su<sup>1,2\*</sup>

<sup>1</sup> *Shenyang National Laboratory for Materials Science (SYNL), Institute of Metal Research,  
Chinese Academy of Science, 72 Wenhua Rd., Shenyang 110016, China.*

<sup>2</sup> *Dalian National Laboratory for Clean Energy (DNL), Dalian Institute of Chemical Physics,  
Chinese Academy of Sciences, 457 Zhongshan Rd., Dalian 116023, China.*

## Supplementary information

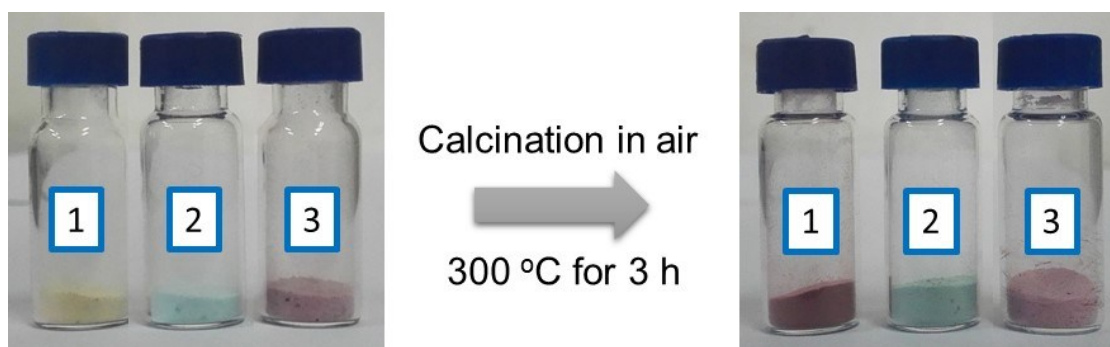

**Figure S1.** Photos displaying the distinctive colors of samples before and after calcination process.

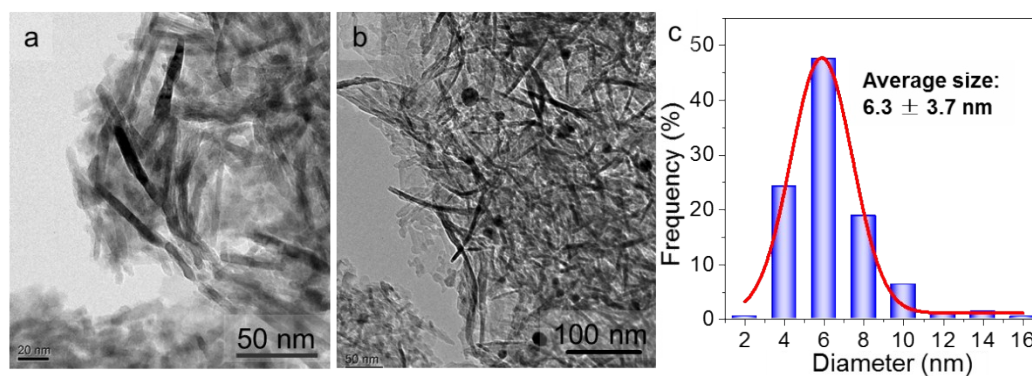

**Figure S2.** TEM images of CuO/AO (a), Au/AO (b), and size distribution of gold nanoparticles in Au/AO (c).

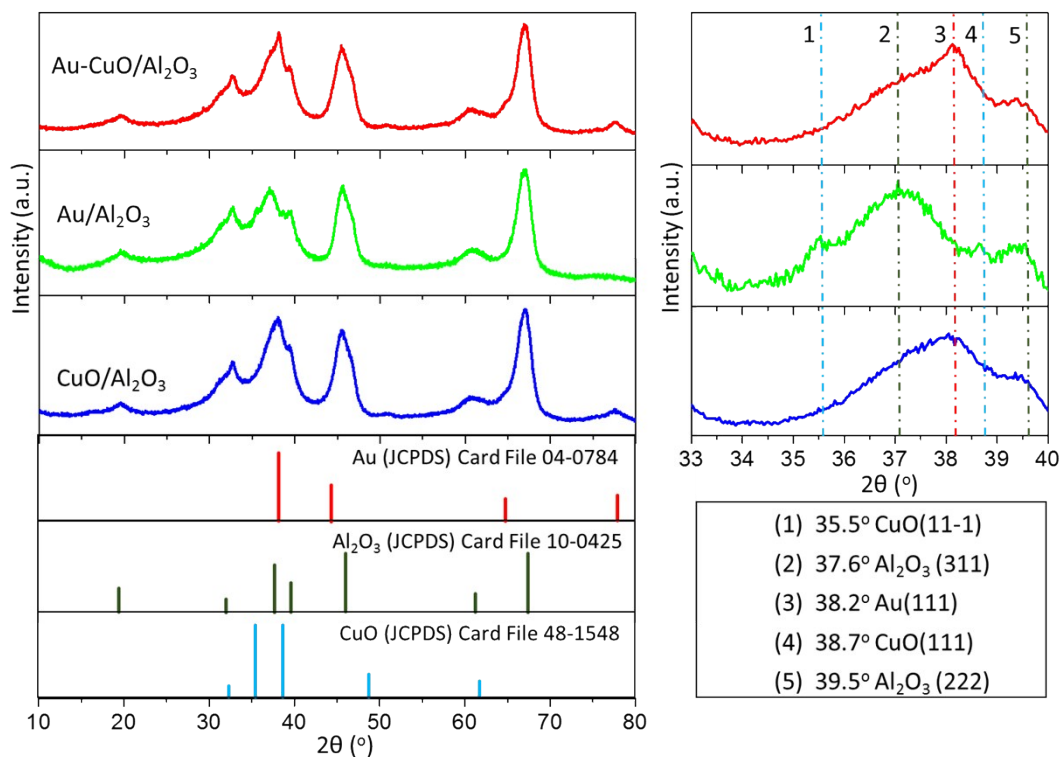

**Figure S3.** XRD patterns of typical samples (left) and zoomed spectra in the range of 33-40° (right).

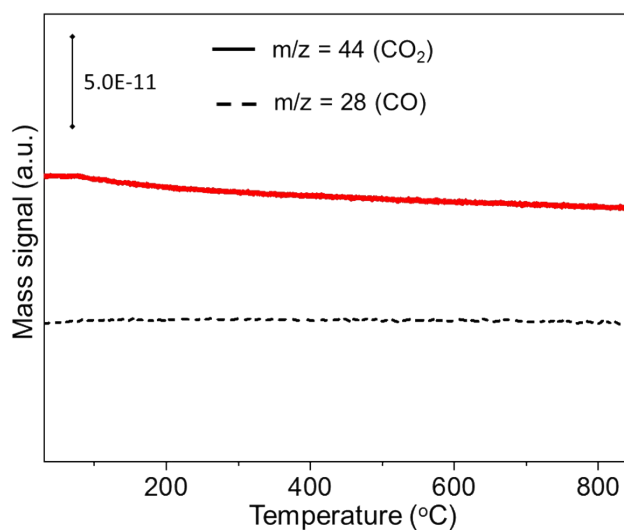

**Figure S4.** CO-TPD profiles of pure Al<sub>2</sub>O<sub>3</sub> powder. The deposition compounds are monitored with m/z intensity of 28 and 44 for CO and CO<sub>2</sub>, respectively, at a heating rate of 5 °C min<sup>-1</sup> in helium.

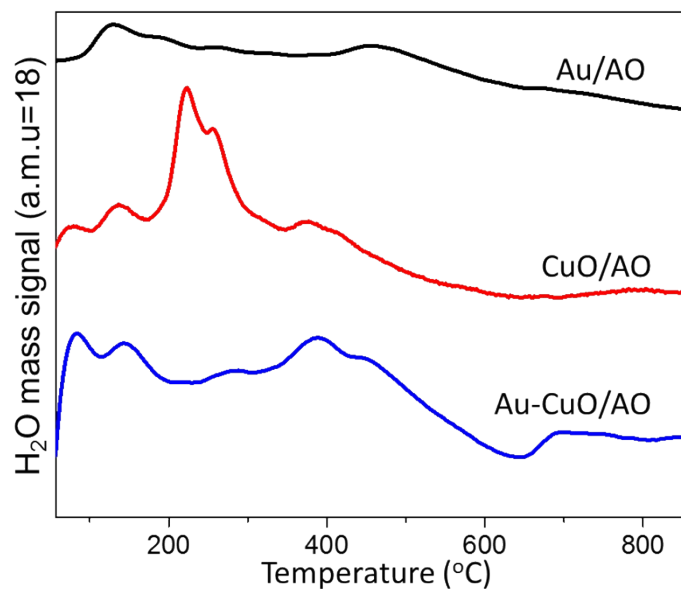

**Figure S5.** H<sub>2</sub>-TPR profiles of the Au/AO, CuO/AO and Au-CuO/AO catalysts. The reduction compounds are monitored by mass spectroscopy with m/z intensity of 18 for H<sub>2</sub>O, at a heating rate of 10 °C·min<sup>-1</sup> in 5% H<sub>2</sub> balanced with helium.

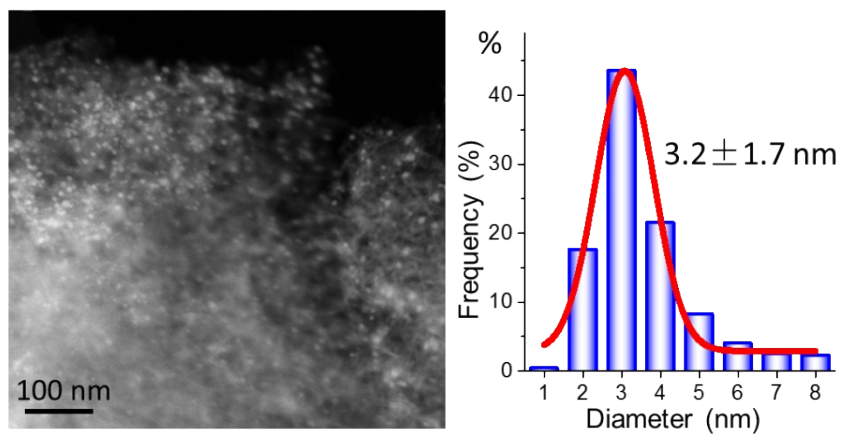

**Figure S6.** STEM image and size distribution of Au/AO-<sub>3.2</sub> with smaller AuNPs.

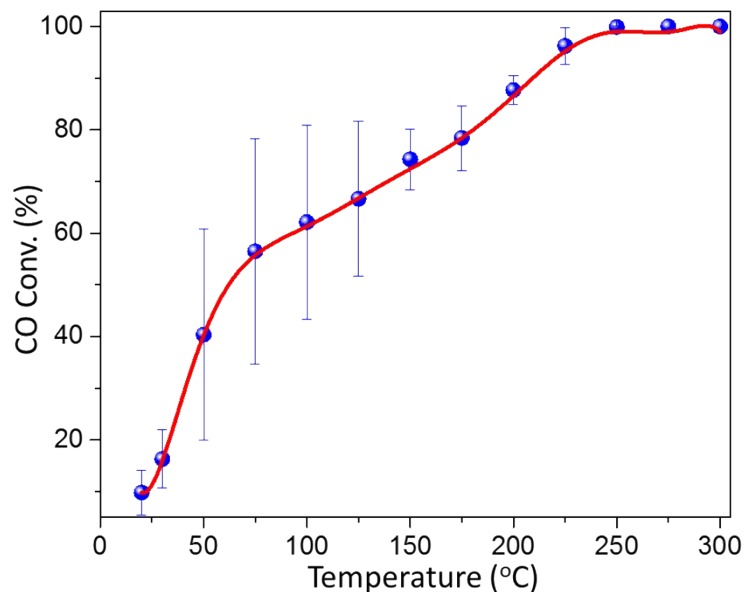

**Figure S7.** CO conversion over three catalysts in CO oxidation as a function of reaction temperature. Conditions: Gas flow rate of  $20 \text{ ml} \cdot \text{min}^{-1}$ , 50 mg catalyst, 1 vol % CO in air. The error bars were marked based on three continuous reaction cycles from room temperature to 300 °C.

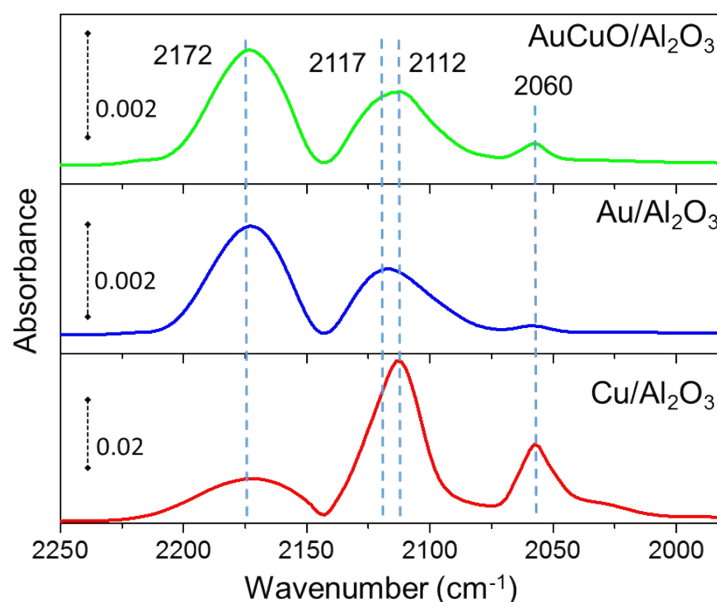

**Figure S8.** FT-IR spectra of different samples as CO adsorption for 30 min in the range of  $2250\text{-}1980 \text{ cm}^{-1}$ .

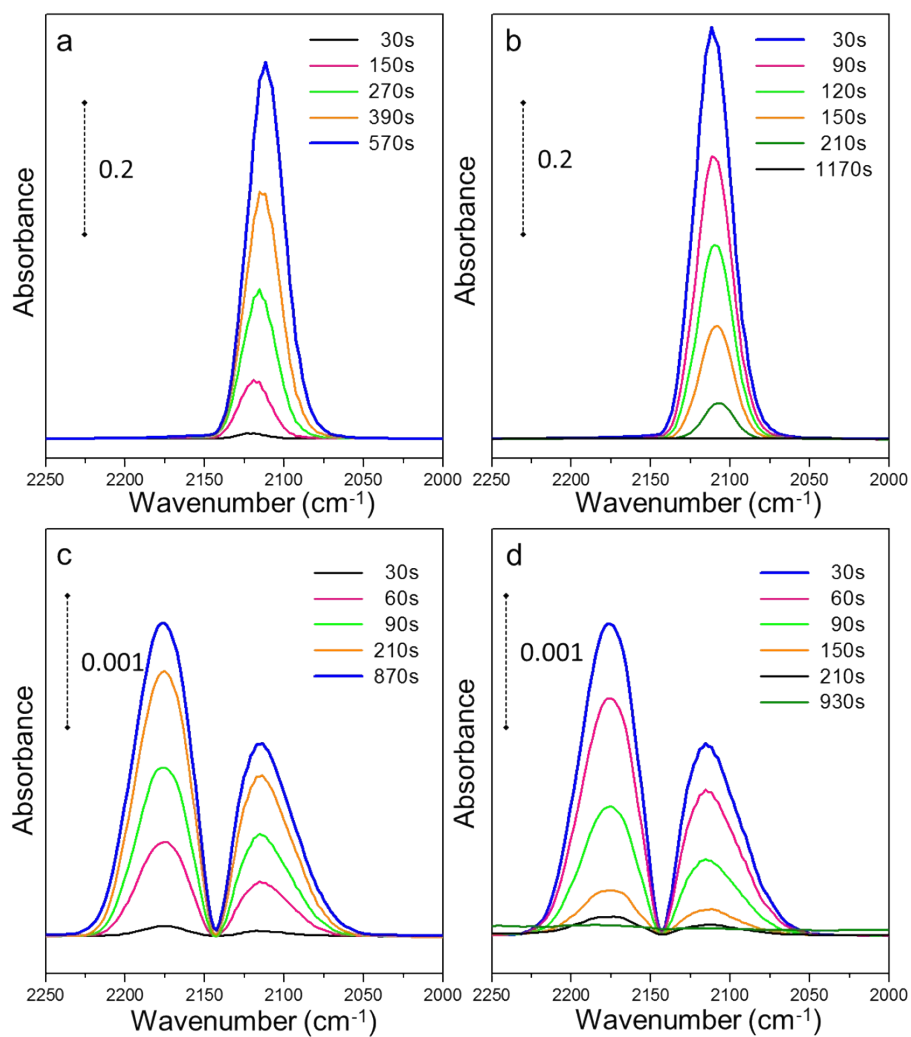

**Figure S9.** Operando DRIFT spectra of CuO/AO (a-b) and Au/AO (c-d) samples as CO adsorption for 30 min in the range of 2250-1980  $\text{cm}^{-1}$ .



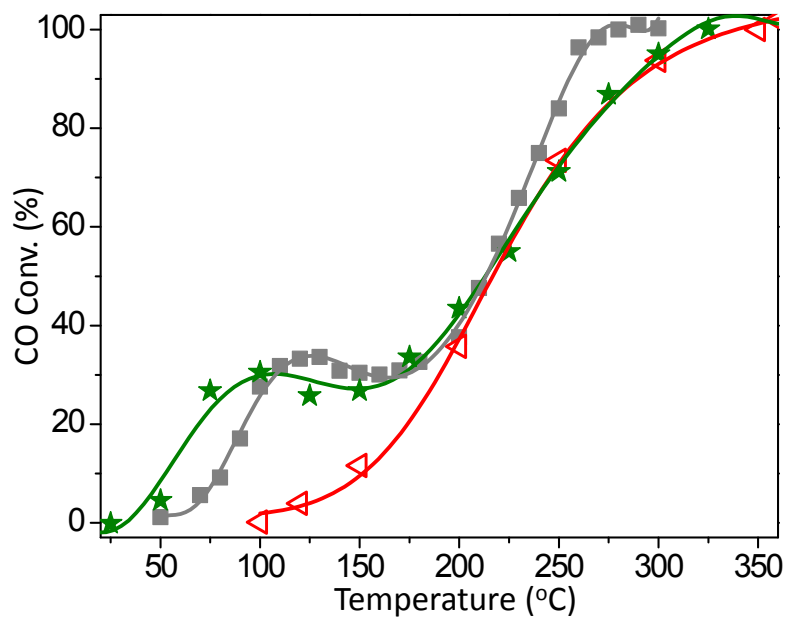

**Figure S12.** CO conversion over Au-CuO/AO as a function of reaction temperature, 2<sup>nd</sup> reaction cycle of calcined Au-CuO/AO (■), 1<sup>st</sup> (◁) and 2<sup>nd</sup> (★) reaction cycles after reduction at 300 °C in H<sub>2</sub> for 1 h.

**Table S1** Information of surface metal compositions revealed by XPS analysis.

| Catalyst | Au/Cu |       | Au 4f           |                  |                            | Cu 2p                              |                  |
|----------|-------|-------|-----------------|------------------|----------------------------|------------------------------------|------------------|
|          | XPS   | ICP   | Au <sup>0</sup> | Au <sup>δ+</sup> | BE of Au <sup>0</sup> (eV) | Cu <sup>0</sup> or Cu <sup>+</sup> | Cu <sup>2+</sup> |
| Au/AO    | -     | -     | 80.3%           | 19.7%            | 83.7                       | -                                  | -                |
| Cu/AO    | -     | -     | -               | -                | -                          | 88.1%                              | 11.9%            |
| Au-Cu/AO | 1:5.2 | 1:1.6 | 90.5%           | 9.5%             | 83.4                       | 89.0%                              | 11.0%            |
